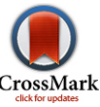

## Correction

# Correction: The HIV-Brazil Cohort Study: Design, Methods and Participant Characteristics

## The *PLOS ONE* Staff

There are multiple errors in the article as described below:

1. The full name for Dr. Valdiléa Veloso is Dr. Valdiléa G. Veloso.
2. The correct name for Dr. Alex Jones Flores Cassanote is Dr. Alex Jones Flores Cassenote.
3. The PDF version does not contain a full list of references. Please refer to the online version for the full list of references.

## Reference

1. Grangeiro A, Escuder MM, Cassanote AJF, Souza RA, Kalichman AO, et al. (2014) The HIV-Brazil Cohort Study: Design, Methods and Participant Characteristics. *PLoS ONE* 9(5): e95673. doi:10.1371/journal.pone.0095673

**Citation:** The *PLOS ONE* Staff (2014) Correction: The HIV-Brazil Cohort Study: Design, Methods and Participant Characteristics. *PLoS ONE* 9(7): e104119. doi:10.1371/journal.pone.0104119

**Published:** July 25, 2014

**Copyright:** © 2014 The *PLOS ONE* Staff. This is an open-access article distributed under the terms of the Creative Commons Attribution License, which permits unrestricted use, distribution, and reproduction in any medium, provided the original author and source are credited.
